# Supplementary material for: Kidney transplant monitoring by urinary flow cytometry: Biomarker combination of T cells, renal tubular epithelial cells, and podocalyxin-positive cells detects rejection
Source: Sci Rep. 2020 Jan 21;10:796. doi: 10.1038/s41598-020-57524-7 (PMC6972704; doi:10.1038/s41598-020-57524-7)
Supplement: Supplementary file 1 — Supplementary Dataset 1. [file 41598_2020_57524_MOESM1_ESM.xlsx]

## Sheet: Tabelle1
age	sex	Diagnosis Biopsy	Treatment	GFR ml/min/1.73m²	Crea mg/dl	Urea mg/dl	Urinary protein/crea ratio mg/g crea	Living donor	Deceased Donor	unknown	HLA Mismatch	Immunosuppression	leves steroids in mg	levels CNI ng/mg	Other leves ng/mg
48.616	m	ACR	methylprednisolone	40	1,9 m	75	2.4	y			PRA 0%	Tacrolimus, mycophenolate, prednisone	prednisone 24	6
78.0424	m	ACR	anti-thymocyte globulin and methylprednisolone	16	3.19	60	222			y		Tacrolimus		10
48.4052	m	ACR	anti-thymocyte globulin and methylprednisolone	7	5.44	200			y			tacrolimus, mycophenolate		6.3
60.4791	f	ACR	methylprednisolone	16	3.28	121	133		y			tacrolimus, mycophenolate, methylprednisolon	methylprednisolone 4	6
46.8638	m	ACR	anti-thymocyte globulin and methylprednisolone	84	1.05	50			y		DSA Class II	tacrolimus, mycophenolate, prednisone	prednisone 4	8.14
75.896	m	ACR	methylprednisolone	21	2.6	105	1810	y			DSA HLA II against DQ, HLA I positive, no DSA	Cyclosporine
49.8645	m	ACR	methylprednisolone	19	3.1	91			y			basiliximab, tacrolimus, methylprednisolon	methylprednisolone 8	8.9
58.1437	f	ACR	anti-thymocyte globulin	7	7.19	76		y				Tacrolimus, mycophenolate, prednisone	prednisone 125	8.2
20.2765	m	ACR, Borderline	methylprednisolone and IgG therapy	28	3.5	128	972			y		everolimus, mycophenolate, prednisone	prednisone 5
70.1492	m	ACR, Borderline	no specific treatment	15	46	4.2	430		y			tacrolimus, mycophenolate		7.9
37.3005	f	ACR, Borderline	no specific treatment	30	2.3	45			y			tacrolimus, mycophenolate
25.1773	m	ACR, Borderline	methylprednisolone	7	15	213		y				tacrolimus, mycophenolate, methylprednisolon	methylprednisolone 4	7.4
26.2259	m	ACR, Borderline	methylprednisolone	33	2.56	53	263	y			MM HLA-A/B/C/DR/DQ: 0/1/1/1/1	tacrolimus, mycophenolate, methylprednisolon	methylprednisolone 8	8.4
40.1725	f	ACR, Borderline	methylprednisolone	7	6.48	114		y			MM HLA-A/B/C/DR/DQ: 1/1/1/1/1	tacrolimus, mycophenolate, methylprednisolon	methylprednisolone 4	9.74
71.1869	f	HRX	methylprednisolone	7	3.4	94	1645		y			mycophenolate, Cyclosporine			ciclosporine 117,9
25.5715	m	HRX	no specific treatment	19	4.03	178			y		HLA Class I und II negative	tacrolimus, mycophenolate, prednisone	prednisone 5	5.6
60.8624	m	HRX	cyclophosphamide	39	1.8	82	577	y				tacrolimus, mycophenolate
53.1855	m	HRX	plasmapheresis and IgG therapy and anti-thymocyte globulin	23	2.97	93	320	y			PRA 58% Class II, donorspecific against DQ8	tacrolimus, mycophenolate, methylprednisolon	methylprednisone 4	5.9
72.0438	m	HRX	no specific treatment	20	2.93	239			y			tacrolimus, mycophenolate		5.2
47.5455	m	HRX	methylprednisolone and plasmapheresis	16	4.19	112	2006		y			everolimus, mycophenolate, methylprednisolon	methylprednisone 2
77.9959	m	HRX	no specific treatment	25	2.4	138	2238			y		tacrolimus, mycophenolate		5.7
39.6523	m	No RX	no specific treatment	51	1.62	42	5	y				tacrolimus, mycophenolate, methylprednisolon	methylprednisone 4	8.5
54.4586	f	No RX	methylprednisolone	24	2.25	92	159		y			tacrolimus, mycophenolate, methylprednisolon	methylprednisone 4	11.3
45.0678	m	No RX	anti-thymocyte globulin	7	5	143		y			MM HLA-A/B/C/DR/DQ: 2/1/1/2/2	tacrolimus, mycophenolate, methylprednisolon	methylprednisone 4	6.8
53.6345	f	No RX	methylprednisolone	29	1.92	98	4366		y			tacrolimus, mycophenolate, methylprednisolon	methylprednisone 4	8.4		cg0
63.7892	m	No RX	no specific treatment	7	4.94	138				y	HLA-Ab negative	tacrolimus, everolimus, methylprednisolon	methylprednisone 4	7	mTor-Inhibitor 3,56
54.3765	m	No RX	no specific treatment	7	4.91	150			y			tacrolimus, mycophenolate		6.5
22.1574	m	No RX	methylprednisolone	54	1.75	51		y			MM HLA-A/B/C/DR/DQ: 1/0/0/0/0	tacrolimus, mycophenolate, methylprednisolon	methylprednisone 24	8.5
72.46	f	No RX	methylprednisolone	7	3.49	123	4593		y			tacrolimus, azathioprine, methylprednisolon	methylprednisone 4			cg1 mm², diskret
53.0048	m	No RX	no specific treatment	33	2.19	77	3436	y			DSA 05/2016	tacrolimus, mycophenolate		11.9		cg0
74.6283	m	No RX	no specific treatment	7	11.33	207			y			tacrolimus, mycophenolate, methylprednisolon	methylprednisone 4	7.8		nein, medikamentös-toxisch
70.9103	m	No RX	no specific treatment	61	1.19	40	931	y				mycophenolate, Cyclosporine				cg0
60.3587	f	No RX	no specific treatment	18	2.78	90	23		y			tacrolimus, mycophenolate, methylprednisolon	methylprednisone 4	9.9
51.0472	f	No RX	no specific treatment	33	1.76	94	116		y			tacrolimus, mycophenolate, prednisone	prednisone 2,5	4.2
66.9541	m	No RX	no specific treatment	7	7.19	72			y		HLA-A,B,DR Missmatch 2-1-1	tacrolimus, mycophenolate, methylprednisolon	methylprednisone 4	17.89		cg0
57.7604	m	No RX	no specific treatment	24	2.78	169	82		y		no HLA-IgG Ab	tacrolimus, mycophenolate, prednisone	prednisone 4	5.5
42.0726	f	No RX	methylprednisolone	22	2.55	89		y			MM HLA-A/B/C/DR/DQ: 1/1/0/1/1	tacrolimus, mycophenolate, prednisone	prednisone 250	22.8
51.1294	m	No RX	no specific treatment	27	2.6	109			y			tacrolimus, mycophenolate, prednisone	prednisone 7,5	25.8		nein, ATN
68.4216	m	No RX	no specific treatment	7	5.76	112			y			tacrolimus, mycophenolate, methylprednisolon	methylprednisone 8	11.7
82.4531	m	control group		44	1.45	50	161		y			tacrolimus, mycophenolate		4.2
55.1704	m	control group		40	1.84	61	221	y				mycophenolate, Cyclosporine			cyclosporine 55,6
45.6619	m	control group		55	1.49	45	115	y				tacrolimus, mycophenolate		9.7
38.768	f	control group		58	1.18	30	133	y				tacrolimus, mycophenolate		4.3
43.7372	m	control group		61	1.39	43	87	y				tacrolimus, mycophenolate		5.5
40.0548	m	control group		63	1.38	47	608		y			tacrolimus, mycophenolate, methylprednisolon	methyprednisone 2	6.7
65.4209	m	control group		78	1.01	34	67		y			tacrolimus, mycophenolate		4.7
48.9966	f	control group		51	1.25	38	98	y				tacrolimus, mycophenolate		4.1
34.7953	f	control group		100	0.59	21	151		y			tacrolimus, mycophenolate		4.5
79.0281	f	control group		30	1.61	80	58		y			tacrolimus, mycophenolate, methylprednisolon	methyprednisone 2	7.48
50.6119	m	control group		89	0.98	34	141		y			everolimus, mycophenolate			mTor Inhibitor 8,82
60.8241	m	control group		76	1.05	28	105		y			sirolimus, mycophenolate, methylprednisolon	methyprednisone 4		mTor Inhibitor 7,48
55.1814	f	control group		45	1.32	66	510		y			mycophenolate, Cyclosporine			cyclo sporine 53,6
40	f	control group		27	2.22	78	447	y				tacrolimus, mycophenolate		15.96
37.8645	f	control group		65	1.09	32	72	y				tacrolimus, mycophenolate, methylprednisolon	methyprednisone 4	5.4
49.807	m	control group		75	1.14	41	963		y			tacrolimus, mycophenolate, methylprednisolon	methyprednisone 4	5.69
54.037	m	control group		31	2.28	140	933		y			tacrolimus, mycophenolate, methylprednisolon	methyprednisone 4	4.76
35.6906	m	control group		61	1.47	54	62		y			tacrolimus, mycophenolate, methylprednisolon	methyprednisone 2	4.39
60.2683	m	control group			1.44	46	119		y			tacrolimus, mycophenolate, methylprednisolon	methyprednisone 8	8.59
59.039	f	control group		16	3.04	125	276		y			keine
43.2553	m	control group		39	1.03	101	58		y			mycophenolate, Cyclosporine			cyclosporine 75,34
24.7666	f	control group		55	1.35	43	310	y				tacrolimus, mycophenolate, methylprednisolon	methyprednisone 10	4.95
36.0356	m	control group		61	1.47	59	183	y				tacrolimus, mycophenolate		4.27
37.8207	f	control group		7	3.98	72	4356	y				mycophenolate, prednisolone	prednisolone 5
